# Supplementary material for: miR-106b suppresses pathological retinal angiogenesis
Source: PubMed Central journal article supplement (PMC7803573; doi:10.18632/aging.202404), 2020-12-23
Supplement: aging-12-202404-s002.pdf [file aging-12-202404-s002.pdf]

## SUPPLEMENTARY TABLE

Supplementary Table 1. List of human and mouse primers.

| <b>Genes (human)</b> | <b>Foward primers</b>          | <b>Reverse primers</b>          |
|----------------------|--------------------------------|---------------------------------|
| B-ACTIN (ACTB)       | 5' GTCATTCCAAATATGAGATGCGT 5'  | 5' TGTGGACTTGGGAGAGGACT 3'      |
| VEGFA                | 5' CTCTACCTCCACCATGCCAAG 3'    | 5' AGACATCCATGAACTTCACCACTTC 3' |
| <b>Genes (mouse)</b> | <b>Foward primers</b>          | <b>Reverse primers</b>          |
| B-ACTIN (ACTB)       | 5' GACGGCCAGGTCATCACTATTG 3'   | 5' CCACAGGATTCCATACCCAAG 3'     |
| VEGFA                | 5' GCCCTGAGTCAAGAGGACAG 3'     | 5' CTCCTAGGCCCTCAGAAGT 3'       |
| MCM7                 | 5' ATGGCGCTTAAGGACTACG 3'      | 5' ATCCAGGTCCACATACAGTG 3'      |
| ATF4                 | 5' CTACTAGGTACCGCCAGAAG 3'     | 5' GCCTTACGGACCTCTTCTAT 3'      |
| HIF1 $\alpha$        | 5' CGAGAACGAGAAGAAAAAGATGAG 3' | 5' AAGCCATCTAGGGCTTTCAG 3'      |

RT-qPCR primer sequences to quantify mRNA expression in choroids (mouse) or HRMECs (human).
