# Supplementary material for: miR-106b suppresses pathological retinal angiogenesis
Source: publisher site journal article supplement (doi:10.18632/aging.202404), 2020-12-23
Supplement: Supplementary file [file aging-v12i24-202404-supplementary-material-SD1.pdf]

**SUPPLEMENTARY FIGURE**

**A**

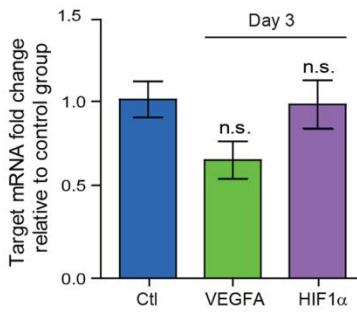

**B**

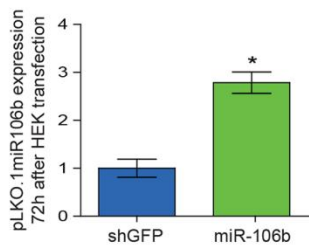

**C**

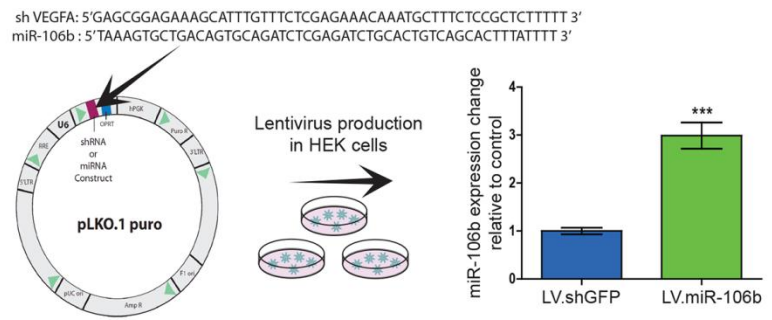

**D**

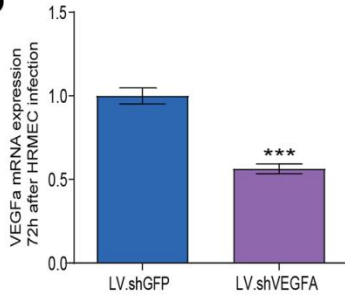

**Supplemental Figure 1.** (A) VEGFA and HIF1 $\alpha$  mRNA expression in choroids 3 days after laser burn (VEGFA n=5, HIF1 $\alpha$  n=7). (B) LV.miR-106b expression after plasmid transfection in HEK cells (n=4). (C) Schematic of plasmid construction, virus production and LV.miR-106b expression 72hrs after viral infection of HRMECs. (D) VEGFA mRNA expression in HRMECs 72hrs after LV.shVEGFA infection. Data are expressed as mean  $\pm$  S.E.M. Unpaired Two-tailed Student's t-test was used for the analysis of groups of 2, and one-way ANOVA with Bonferroni post-hoc test was performed on groups of 3 or more, \*P < 0.05; \*\*P < 0.001; \*\*\*P < 0.0001.
